# Supplementary material for: Tailoring Heat Transfer and Bactericidal Response in Multifunctional Cotton Composites
Source: MDPI journal article supplement (doi:10.3390/nano13030463), 2023-01-23
Supplement: s1 [file s1]

# Tailoring Heat Transfer and Bactericidal Response in Multifunctional Cotton Composites

Lilian Pérez Delgado <sup>1,\*</sup>, Adriana Paola Franco-Bacca <sup>1</sup>, Fernando Cervantes-Alvarez <sup>1</sup>, Elizabeth Ortiz-Vazquez <sup>2</sup>, Jesús Manuel Ramon-Sierra <sup>2</sup>, Víctor Rejon <sup>1</sup>, María Leopoldina Aguirre-Macedo <sup>3</sup>, Juan José Alvarado-Gil <sup>1</sup> and Geonel Rodríguez-Gattorno <sup>1,\*</sup>

<sup>1</sup> Merida Unit, Functional Materials Laboratory, Applied Physics Department, Center for Research and Advanced Studies (CINVESTAV), C.P. 97310 Merida, Mexico; adriana.franco@cinvestav.mx (F.-B.A.P.); fernando.cervantes@cinvestav.mx (C.-A.F.); vrejon@cinvestav.mx (R.V.); juan.alvarado@cinvestav.mx (A.-G.J.J.)

<sup>2</sup> Merida Unit, Laboratory of Applied and Molecular Microbiology, National Technological Institute of Mexico, C.P. 9711 Merida, Mexico; elizabeth.ov@merida.tecnm.mx (O.-V.E.); jesus.rs@merida.tecnm.mx (R.-S.J.)

<sup>3</sup> Merida Unit, Aquatic Pathology Laboratory, Marine Resources Department, Center for Research and Advanced Studies (CINVESTAV), C.P. 97310 Merida, Mexico; leopoldina.aguirre@cinvestav.mx

\* Correspondence: lilian.perez@cinvestav.mx (D.L.P.); geonelr@cinvestav.mx (R.-G.G.)

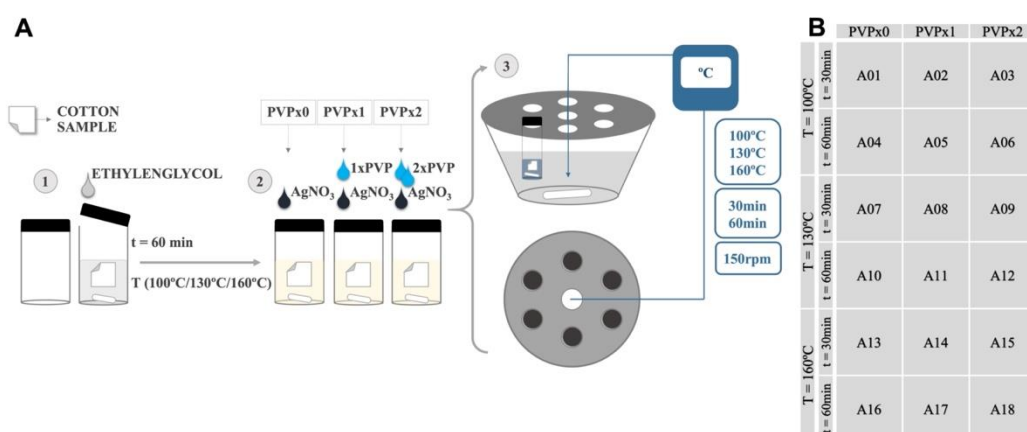

**Figure S1.** (A) Descriptive three steps diagram of the general methodology for the coating of AgNPs on textile fibers. The synthesis process was carried out in a self-design device with a glass base, metal cover, six holes for hexagonal distribution samples and a central one for the temperature sensor and vapor outlet. (B) Distribution of eighteen samples according to the selected reaction parameters.

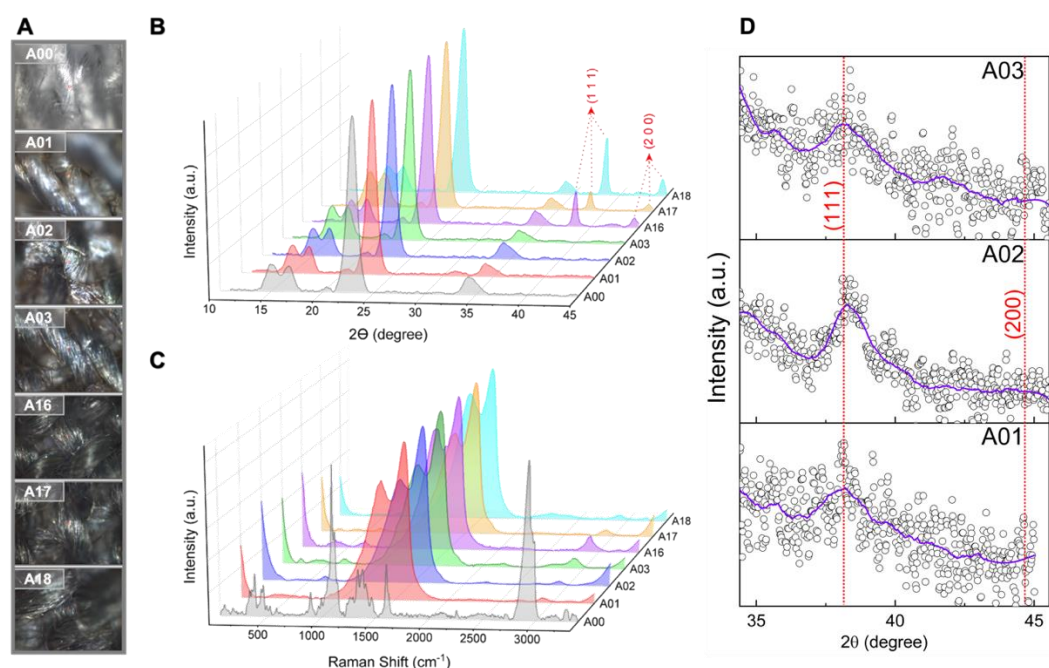

**Figure S2.** (A) Digital microscope images, (B) XRD and Raman (C) spectra of threads from bare cotton (A00) and six selected AgNPs@cellulose samples: A01 ( $T = 100^{\circ}\text{C}$ ,  $t = 30$  min, PVPx0), A02 ( $T = 100^{\circ}\text{C}$ ,  $t = 30$  min, PVPx1), A03 ( $T = 100^{\circ}\text{C}$ ,  $t = 30$  min, PVPx2), A16 ( $T = 160^{\circ}\text{C}$ ,  $t = 60$  min, PVPx0), A17 ( $T = 160^{\circ}\text{C}$ ,  $t = 60$  min, PVPx1) and A18 ( $T = 160^{\circ}\text{C}$ ,  $t = 60$  min, PVPx2). (D) magnification of the angular range where reflections of the metallic silver are expected, for samples A01, A02 and A03.

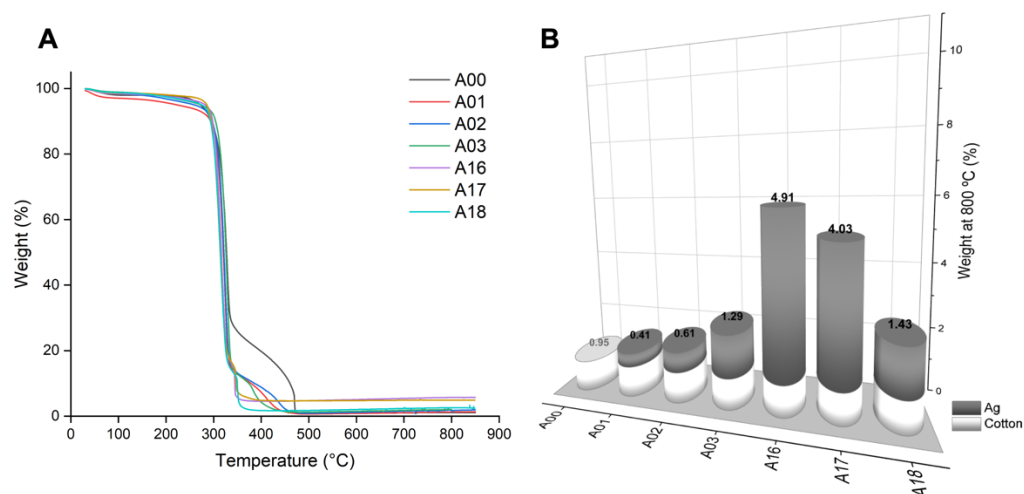

**Figure S3.** TGA curves (A) and percentage weight values at 800 °C. (B) of bare cotton (A00) and six selected AgNPs@cellulose samples: A01 ( $T = 100^{\circ}\text{C}$ ,  $t = 30$  min, PVPx0), A02 ( $T = 100^{\circ}\text{C}$ ,  $t = 30$  min, PVPx1), A03 ( $T = 100^{\circ}\text{C}$ ,  $t = 30$  min, PVPx2), A16 ( $T = 160^{\circ}\text{C}$ ,  $t = 60$  min, PVPx0), A17 ( $T = 160^{\circ}\text{C}$ ,  $t = 60$  min, PVPx1) and A18 ( $T = 160^{\circ}\text{C}$ ,  $t = 60$  min, PVPx2).
